# Supplementary material for: Social Nesting, Animal Welfare and Disease Monitoring
Source: Preprints.org preprint supplement (doi:10.20944/preprints202103.0548.v1), 2021-03-22
Supplement: Supplementary file 3 [file supplementary]

**The Mann-Whitney U test (Treatment)**

| **N** | 80 |
| --- | --- |
| **The Mann-Whitney U test** | 575.000 |
| **The Wilcoxon test** | 1.395.000 |
| **Statistical tests** | 575.000 |
| **The standard error (SE)** | 98.951 |
| **Asymptotic Sig (bilateral)** | 0.023 |

**
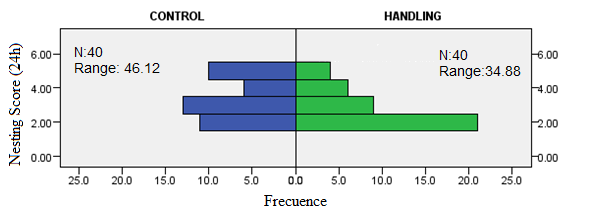
Nesting at 24h**

**
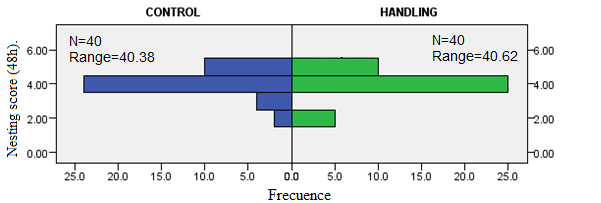
Nesting at 48h**

| **N** | 80 |
| --- | --- |
| **The Mann-Whitney U test** | 805.000 |
| **The Wilcoxon test** | 1.625.000 |
| **Statistical tests** | 805.000 |
| **The standard error (SE)** | 90.235 |
| **Asymptotic Sig (bilateral)** | 0.956 |

**
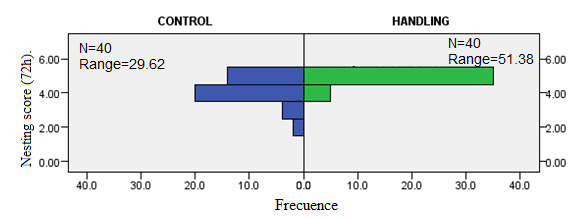
Nesting at 72h**

| **N** | 80 |
| --- | --- |
| **The Mann-Whitney U test** | 1.235.000 |
| **The Wilcoxon test** | 2.055.000 |
| **Statistical tests** | 1.235.000 |
| **The standard error (SE)** | 89.378 |
| **Asymptotic Sig (bilateral)** | 0.000 |
